# Supplementary material for: Assessment of the Impact of a Toll-like Receptor 2 Agonist Synthetic Lipopeptide on Macrophage Susceptibility and Responses to African Swine Fever Virus Infection
Source: MDPI journal article supplement (doi:10.3390/v14102212), 2022-10-08
Supplement: s1 [file s1]

**Supplementary Table S1.** Oligonucleotide Primer and Probe sets for detection of several porcine viruses in pig blood.

| Virus | Sequences                                                                                                                  | Reference / Accession |
|-------|----------------------------------------------------------------------------------------------------------------------------|-----------------------|
| PCV2  | F: 5'-TGGCCCGCAGTATTCTGATT-3'<br>R: 5'-CAGCTGGGACAGCAGTTGAG-3'<br>Probe 5'-FAM-CCAGCAATCAGACCCCGTTGGAATG-BHQ1-3'           | [25]                  |
| PPV   | F: 5'-GAAGACTGGATGATGACAGATCCA-3'<br>R: 5'-TGCTGTTTTTGTTCCTTGCTAGAGTAA-3'<br>Probe 5'-VIC-AATGATGGCTCAAACCGGAGGAGA-BHQ1-3' | [26]                  |
| ASFV  | F: 5'-CTGCTCATGGTATCAATCTTATCG A-3'<br>R: 5'-GATACCACAAGATCRGCCGT-3'<br>Probe 5'-FAM-CCACGGGAGGAATACCAACCCAGTG-TAMRA-3'    | [27]                  |

**Supplementary Table S2.** Antibodies used for flow cytometry.

| Antibody             | Reactivity            | Clone   | Isotype     | Conjugate | Concentration (mg/mL) | Working dilution* |
|----------------------|-----------------------|---------|-------------|-----------|-----------------------|-------------------|
| Primary Antibodies   |                       |         |             |           |                       |                   |
| MHC I                | Pig                   | JM1E3   | Mouse IgG1  | -         | 0.1                   | 1/40              |
| CD14                 | Human                 | Tuk4    | Mouse IgG2a | Per-CP    | ND                    | 1/5               |
| MHC II DR            | Pig                   | 2E9/13  | Mouse IgG2b | -         | 0.1                   | 1/25              |
| CD163                | Pig                   | 2A10/11 | Mouse IgG1  | PE        | ND                    | 1/4               |
| CD16                 | Pig                   | G7      | Mouse IgG1  | PE        | ND                    | 1/4               |
| P72                  | ASFV late protein P72 | 18BG3   | Mouse IgG2a | FITC      | 1                     | 1/25              |
| Secondary Antibodies |                       |         |             |           |                       |                   |
| Anti-IgG1            | Mouse                 | A85-1   | Rat IgG1    | BV421     | 0.2                   | 1/25              |
| Anti-IgG2b           | Mouse                 | R12-3   | Rat IgG2a   | BV786     | 0.2                   | 1/25              |

ND: not determined. \* 10 µL of diluted antibody were added to cell pellets (100 µL total).

**Supplementary Table S3.** Oligonucleotide Primer Sets for Evagreen qRT Real-Time PCR in pig moMΦ.

| Gene                           | Sequences                                                                 | Reference/Accession |
|--------------------------------|---------------------------------------------------------------------------|---------------------|
| <i>IL-1<math>\beta</math></i>  | F:5'-AATTCGAGTCTGCCCTGTACCC-3'<br>R:5'-TGGTGAAGTCGGTTATATCTTGGC-3'        | [33]                |
| <i>IL-6</i>                    | F:5'-CAGAGATTTTGCCGAGGATG-3'<br>R:5'-TGGCTACTGCCTTCCCTACC-3'              | [33]                |
| <i>IL-10</i>                   | F:5'-AGCCAGCATTAAGTCTGAGAA-3'<br>R:5'-CCTCTCTTGGAGCTTGCTAA-3'             | [34]                |
| <i>IL-12p40</i>                | F:5'-TCAGGGACATCATCAAACCA-3'<br>R:5'-GAACACCAAACATCAGGGAAA-3'             | [34]                |
| <i>TNF-<math>\alpha</math></i> | F:5'-TGCCTACTGCACTTCGAGGTTATC-3'<br>R:5'-GTGGGCGACGGGCTTATCTG-3'          | [35]                |
| <i>IFN-<math>\beta</math></i>  | F:5'-AGTTGCCTGGGACTCCTCAA-3'<br>R:5'-CCTCAGGGACCTCGAAGTTCAT-3'            | [36]                |
| <i>TLR2</i>                    | F:5'-CGGCTTCCAAGGATGGAGAAA-3'<br>R:5'-TCCAGAGAGTTGACCTTGACG-3'            | NM213761.1          |
| <i>TLR3</i>                    | F:5'-TGAAGAACTTGATTTTCCTTGGCA-3'<br>R:5'-GGCATGAAAACACCCTGGAG-3'          | [14]                |
| <i>TLR7</i>                    | F:5'-GTGGAAATTGCCCTCGTTGT-3'<br>R:5'-GATGGATCTGTAGGGGAGCA-3'              | [14]                |
| <i>TLR8</i>                    | F: 5'-AAGACAACCAGTTACGTGAAATACC-3'<br>R: 5'-GGGTGTTAAAAGATAATGACAGCAC- 3' | [33]                |
| <i>TLR9</i>                    | F:5'-AGGACTTCATGCCAAACTGC-3'<br>R:5'-CGAGCAAACATCTCCGACTG-3'              | [14]                |
| <i>cGAS</i>                    | F:5' -TGGAGTGAAATGTTGCAGGAAAGA-3'<br>R:5' -GGGTCCTGGGTACAGACGTG-3'        | XM_013985148        |
| <i>STING</i>                   | F:5'-GCCTGCATCCATCCATCCCA-3'<br>R:5' -GCTGCTCTGGTACCTGGAGTG-3'            | NM_001142838        |
| <i>RIG-I</i>                   | F:5' -GAATCTGCACGCTTTCGGGG-3'<br>R:5' -CTGCACCTCATCGTCCCTA-3'             | NM_213804.2         |
| <i>MDA5</i>                    | F:5' -TGCTGTGAAAGCAATGCAGAATC-3'<br>R:5' -CGAGACGTCCAGACTTGCT-3'          | NM_001100194.1      |
| <i>IFR3</i>                    | F:5' -GGGAAGGAGGCGTGTTTCGAC-3'<br>R:5'-ACCAGAGGGTGTAGCGTGGT-3'            | NM_213770.1         |
| <i>GAPDH</i>                   | F:5'-ACCCAGAAGACTGTGGATGG-3'<br>R:5'-ACGCCTGCTTCACCACCTTC-3'              | [39]                |

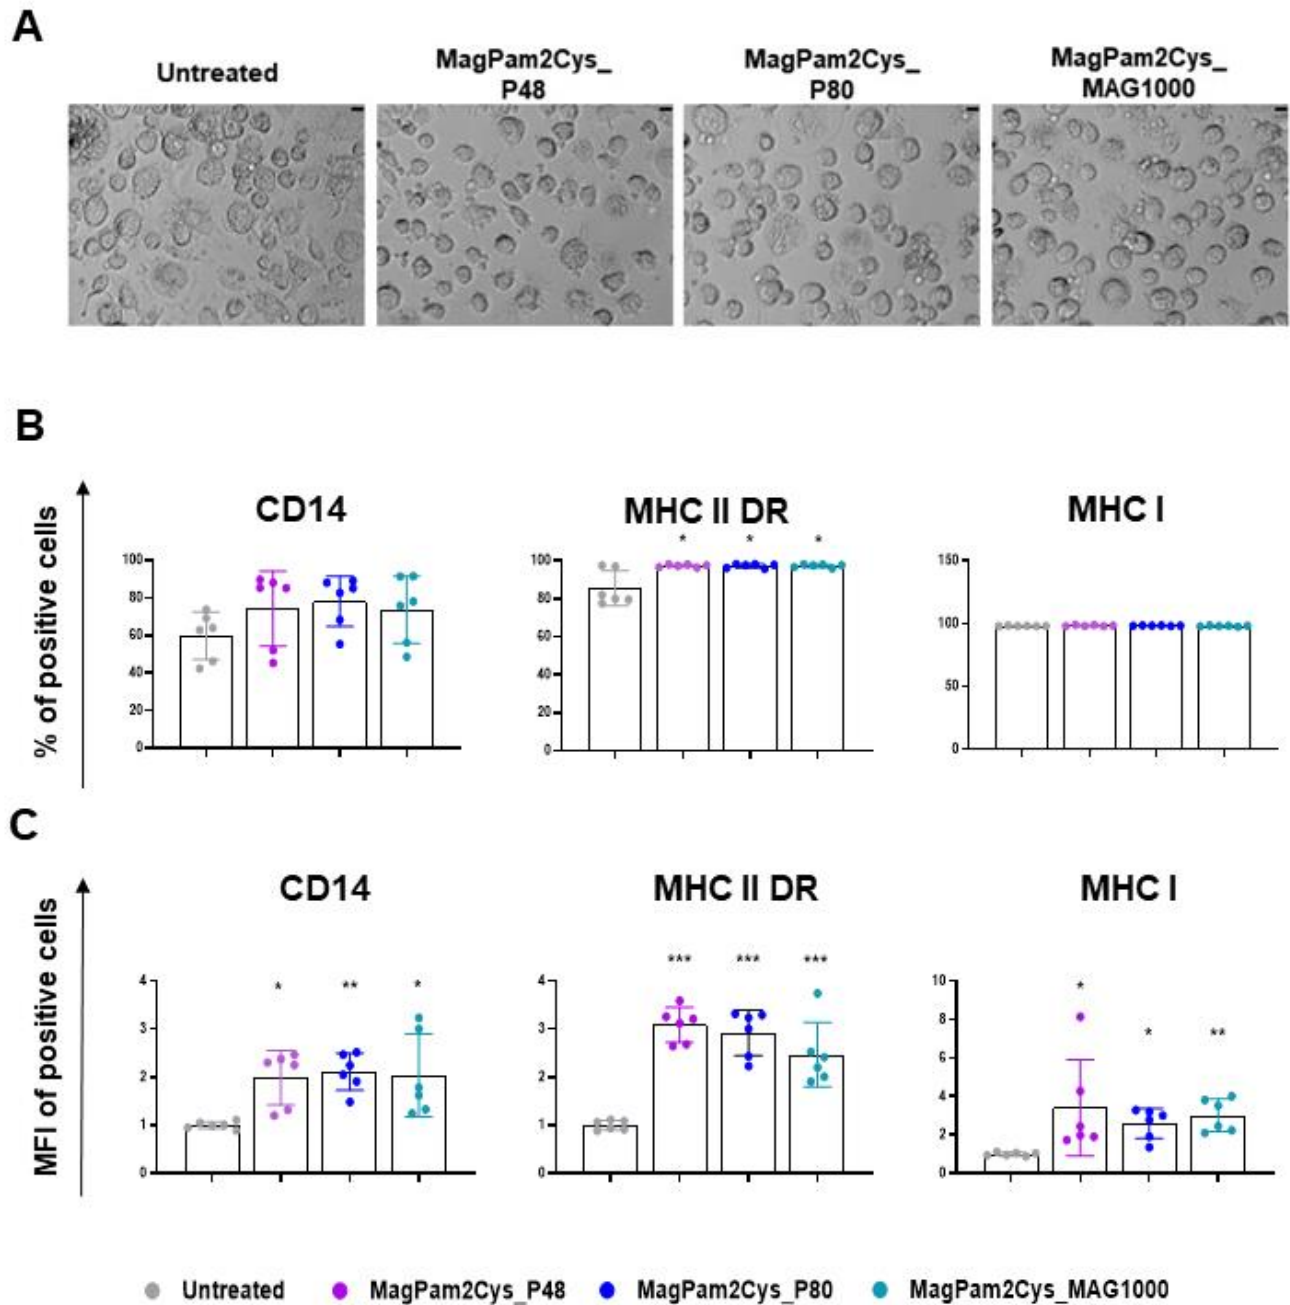

**Figure S1. Effect of diverse TLR2 agonists on porcine moMΦ morphology and surface marker expressions.** Porcine moMΦ were left untreated or stimulated with 100 ng/mL of diverse TLR2 agonists (MagPam2Cys\_P48, MagPam2Cys\_P80, MagPam2Cys\_MAG1000). (A) 24 h post-stimulation, morphology were evaluated. Phase contrast microscopy images were acquired using an inverted microscope, with a magnification 20x. Scale bar, 10  $\mu$ m. (B, C) 24h post-stimulation, flow cytometry was employed to determine surface expression of MHC I, MHC II, CD14. For each marker, percentages of positive cells (B) and mean fluorescence intensity (MFI) of positive cells (C) are presented. MFI data are expressed as fold change relative to the mock-infected un-activated condition (moMΦ mock). Values of treated macrophages were compared to the untreated control (moMΦ), using a one-way ANOVA followed by Dunnett's multiple comparison test or a Kruskal-Wallis test followed by Dunn's multiple comparison test; \*\*\*  $p < 0.001$ , \*\*  $p < 0.01$ , \*  $p < 0.05$ .

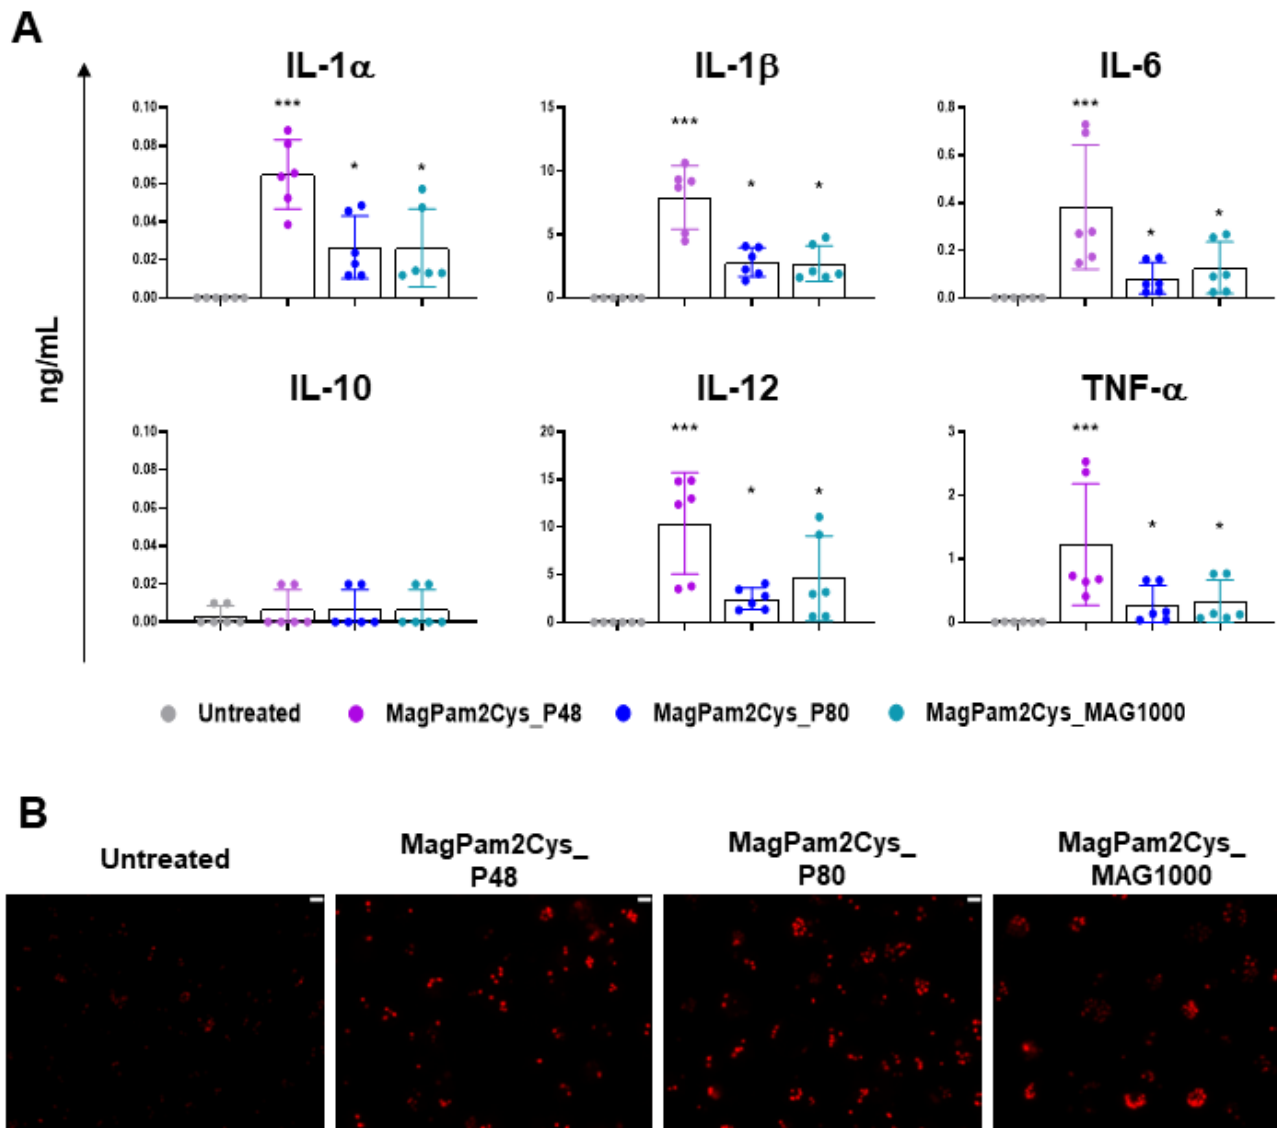

**Figure S2. Effect of diverse TLR2 agonists on porcine moM $\Phi$  cytokine release and phagocytic activity.** Porcine moM $\Phi$  were left untreated or stimulated with MagPam2Cys\_P48 or MagPam2Cys\_P80 or MagPam2Cys\_MAG1000 (all at 100 ng/mL). (A) 24h post-stimulation, culture supernatants were collected and levels of IL-1 $\alpha$ , IL-1 $\beta$ , IL-6, IL-10, IL-12, TNF- $\alpha$  were determined using a multiplex ELISA. For both A and B, the mean data  $\pm$  SD from three independent experiments utilizing different blood donors are presented. Values of treated macrophages were compared to the untreated control (moM $\Phi$ ), using a one-way ANOVA followed by Dunnett's multiple comparison test or a Kruskal-Wallis test followed by Dunn's multiple comparison test; \*\*\*  $p < 0.001$ , \*\*  $p < 0.01$ , \*  $p < 0.05$ . (B) 24 h post-stimulation, macrophage phagocytotic ability was evaluated using a red zymosan bioparticle conjugated (red). Cells were incubated with bioparticle 2h at 37°C, then images were acquired using a fluorescence microscope, using a 20x magnification. Representative images, one for each condition (untreated, treated with 100 ng/mL of either MagPam2Cys\_P48 or MagPam2Cys\_P80 or MagPam2Cys\_MAG1000) are displayed in panel C. Scale bar 10  $\mu$ M.

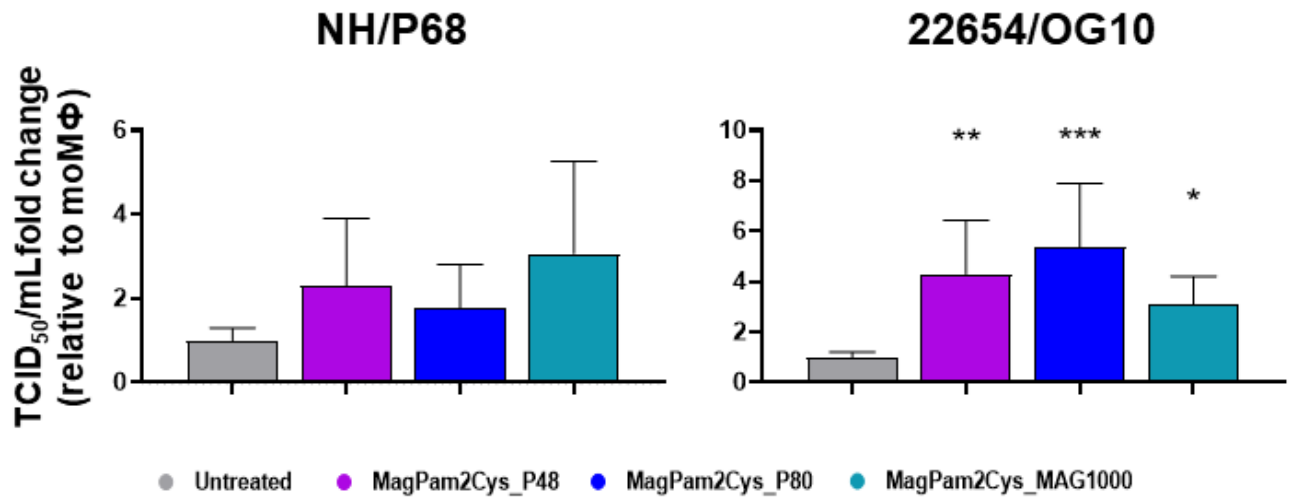

**Figure S3.** Impact of diverse synthetic diacylated lipopeptides on porcine moMΦ ability to sustain ASFV replication. Porcine moMΦ were left untreated or stimulated with MagPam2Cys\_P48 or MagPam2Cys\_P80 or MagPam2Cys\_MAG1000 (all at 100 ng/mL). Cells were infected with either attenuated NH/P68 or virulent 26544/OG10, using a MOI of 0.01. At 72 h pi, culture supernatants were collected, and the levels of infectious viral progeny were determined by titration (TCID<sub>50</sub>/mL). Data of each animal are presented as fold change to the corresponding untreated control (moMΦ). Fold change to untreated moMΦ was determined for each pig as the ratio between treated and untreated (moMΦ) cells. The mean data + SD from four independent experiments utilizing different blood donors are shown. For each isolate (NH/P68 or 26544/OG10), values of treated macrophages were compared to the corresponding untreated control (moMΦ), Kruskal–Wallis test followed by a Dunn’s multiple comparison test; \*\*  $p < 0.01$ , \*  $p < 0.05$ .

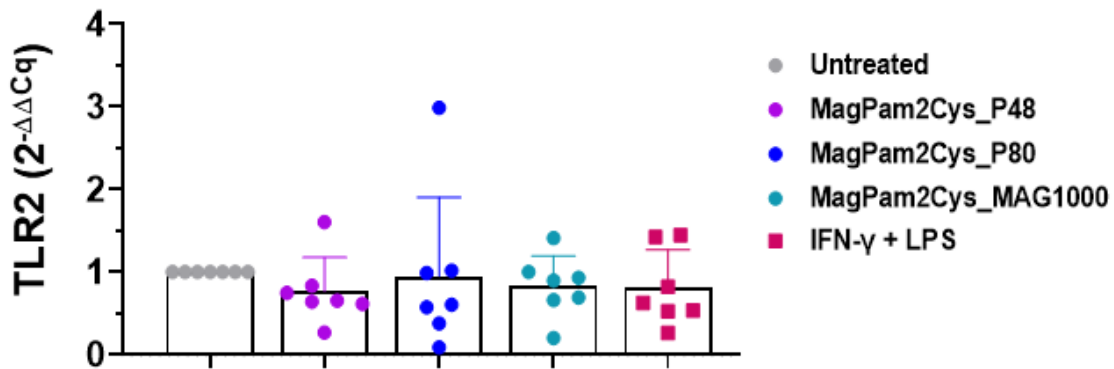

**Figure S4.** Modulation of TLR2 expression by diverse diacylated lipopeptides. Porcine moMΦ were left untreated or stimulated with diverse TLR2 agonists: MagPam2Cys\_P48 or MagPam2Cys\_P80 or MagPam2Cys\_MAG1000 (all at 100 ng/mL). MoM1 (generated with IFN-γ + LPS) were included in the experiments. 24h later, expression of TLR2 was determined by RT-qPCR. Data were normalized on the values of the untreated control (moMΦ) and expressed as 2<sup>-ΔΔCq</sup>, with ΔCq = Cq (target gene) – Cq (house-keeping gene), and ΔΔCq = ΔCq (stimulated samples) – ΔCq (untreated samples). The mean data + SD from seven independent experiments using different animals are shown. Values of treated macrophages were compared to the untreated control (moMΦ), using a Kruskal–Wallis test followed by Dunn’s multiple comparison test.
